# Supplementary material
Source: publisher figshare collection journal article supplement (https://acs.figshare.com/ndownloader/files/4275012)
Supplement: Supplementary file 1 [file 4275012]

## Electronic Supplementary Information

### **Highly Efficient and Reversible SO<sub>2</sub> Capture by Tunable Azole-based Ionic Liquids through Multiple-Site Chemical Absorption**

Congmin Wang,<sup>1</sup> Guokai Cui,<sup>1</sup> Xiaoyan Luo,<sup>1</sup> Yingjie Xue,<sup>1</sup> Haoran Li,<sup>1</sup> and Sheng Dai<sup>2</sup>

<sup>1</sup>Department of Chemistry, Zhejiang University, Hangzhou 310027, P. R. China,

<sup>2</sup>Chemical Sciences Division, Oak Ridge National Laboratory, Oak Ridge, TN 37831, USA  
and Department of Chemistry, University of Tennessee, Knoxville, TN 37996-1600, USA

Email: [chewcm@zju.edu.cn](mailto:chewcm@zju.edu.cn); [lihr@zju.edu.cn](mailto:lihr@zju.edu.cn); [dais@ornl.gov](mailto:dais@ornl.gov)

## Experimental Section

### Materials and general methods

Tetrazole (Tetz), imidazole (Im), and trihexyl(tetradecyl)phosphonium bromide ([P<sub>66614</sub>][Br]) were purchased from Adrich. An anion-exchange resin [DOWEX MONOSPHERE 550A (OH)] was obtained from Dow Chemical Company. All chemicals were obtained in the highest purity grade possible, and were used as received unless otherwise stated. All Ionic Liquids (ILs) samples were dried under vacuum at 60 °C for 24 h to reduce possible traces of water. <sup>1</sup>H NMR, <sup>13</sup>C NMR, and <sup>15</sup>N NMR spectra were recorded on a Bruker spectrometer (500MHz) in CDCl<sub>3</sub> or DMSO-d<sub>6</sub> with tetramethylsilane as the standard. FT-IR spectra were recorded on a Nicolet 470 FT-IR spectrometer, and in-situ IR spectra were recorded on a Bruker MATRIX-MF. Decomposition temperatures were measured with a TGA 2100 series of TA Instrument with a heating rate of 10°C/min.

### Preparation of azole-based ILs

The ILs were prepared by neutralizing of trihexyl(tetradecyl)phosphonium hydroxide ([P<sub>66614</sub>][OH]) and weak proton donors such as tetrazole according to literature's method.<sup>1,2</sup> A solution of [P<sub>66614</sub>][OH] in ethanol was prepared from [P<sub>66614</sub>][Br] using the anion-exchange resin method. Equimolar tetrazole was added to the [P<sub>66614</sub>][OH] solution in ethanol. The mixture was then stirred at room temperature for 12 h. Subsequently, ethanol and water were distilled off at 60 °C under reduced pressure. The obtained ILs was dried in high vacuum for 24 h at 60 °C. The structures of these azole-based ILs were confirmed by NMR and IR spectroscopy; no impurities were found by NMR. The water content of these ILs was determined with a Karl Fisher titration and found to be less than 0.1 wt%. The residual bromide content of these basic ILs was determined by a semi-quantitative Nessler cylinder method, which showed that the bromide content was lower than 0.15 wt%.

### Absorption and desorption of SO<sub>2</sub>

In a typical absorption of SO<sub>2</sub>, SO<sub>2</sub> of atmospheric pressure was bubbled through about 1.0 g ILs in a glass container with an inner diameter of 10 mm, and the flow rate was about 60 ml min<sup>-1</sup>. The glass container was partly immersed in a circulation water bath of desirable temperature. The amount of SO<sub>2</sub> absorbed was determined at regular intervals by the electronic balance with an accuracy of ± 0.1 mg. During the absorption of SO<sub>2</sub> under reduced pressure, SO<sub>2</sub> was diluted with N<sub>2</sub> in order to reduce the partial pressure of SO<sub>2</sub> passing through the system. The SO<sub>2</sub> partial pressure was controlled by changing the flow of SO<sub>2</sub> and N<sub>2</sub>. The standard deviations of the absorption loadings under 1.0 and 0.1 bar are 0.07 and 0.05 mole SO<sub>2</sub> per mole IL, respectively.

The ILs were regenerated by heating or bubbling nitrogen through ILs. In a typical desorption of SO<sub>2</sub>, N<sub>2</sub> of atmospheric pressure was bubbled through about 1.0 g captured ILs in a glass container, which was partly immersed in a circulation oil bath of desirable temperature, and the flow rate was about 60 ml min<sup>-1</sup>. The release of SO<sub>2</sub> was determined at regular intervals by the electronic balance.

#### **NMR and IR data of azole-based ILs**

**[P<sub>66614</sub>][Tetz]:** <sup>1</sup>H NMR (CDCl<sub>3</sub>): 0.81 (m, 12H, CH<sub>3</sub>), 1.10-1.40 (m, 48H, CH<sub>2</sub>), 2.10 (m, 8H, PCH<sub>2</sub>), 8.28 ppm (s, 1H, Tetraz C5); <sup>13</sup>C NMR (CDCl<sub>3</sub>): 13.8, 14.0, 18.5, 18.9, 21.5, 22.2, 22.6, 28.8, 29.2, 29.4, 29.5, 30.2, 30.3, 30.5, 30.6, 30.9, 31.8, 149.7 ppm; <sup>15</sup>N NMR (CDCl<sub>3</sub>): 318.9; 388.9 ppm; IR: 2956, 2925, 2855, 1465, 1420, 1377, 1136, 1110, 1043, 1006, 979, 849, 805, 715, 704, 676, 665, 657, 650 cm<sup>-1</sup>.

**After the absorption of SO<sub>2</sub>:** <sup>1</sup>H NMR (CDCl<sub>3</sub>): 0.87 (m, 12H, CH<sub>3</sub>), 1.20-1.60 (m, 48H, CH<sub>2</sub>), 2.24 (m, 8H, PCH<sub>2</sub>), 8.92 ppm (s, 1H, Tetraz C5); <sup>13</sup>C NMR (CDCl<sub>3</sub>): 13.8, 14.0, 18.5, 18.9, 21.5, 22.2, 22.6, 28.7, 29.2, 29.4, 29.5, 30.1, 30.2, 30.5, 30.6, 30.8, 31.8, 142.9 ppm; <sup>15</sup>N NMR (CDCl<sub>3</sub>): 375.5, 280.9 ppm; IR: 2958, 2929, 2857, 1467, 1327, 1144, 1042, 989, 935, 868, 806, 706, 694, 683, 667, 648 cm<sup>-1</sup>.

**[P<sub>66614</sub>][Im]:** <sup>1</sup>H NMR (d<sub>6</sub>-DMSO): 0.87 (m, 12H, CH<sub>3</sub>), 1.20-1.50 (m, 48H, CH<sub>2</sub>), 2.17 (m, 8H, PCH<sub>2</sub>), 6.66 (s, 2H, Im C4 and C5), 7.08 ppm (m, 1H, Im C2); <sup>13</sup>C NMR (d<sub>6</sub>-DMSO): 14.2, 14.3, 17.7, 18.1, 21.1, 22.3, 22.6, 28.7, 29.2, 29.5, 29.6, 30.2, 30.3, 30.4, 30.6, 30.9, 31.8, 124.6, 142.3 ppm; <sup>15</sup>N NMR (CDCl<sub>3</sub>): 250.9 ppm; IR: 2956, 2924,

2854, 2136, 1465, 1379, 1301, 1264, 1217, 1151, 1075, 1062, 1045, 916, 817, 756, 718.701, 686, 676, 667, 652 cm<sup>-1</sup>.

**After the absorption of SO<sub>2</sub>:** <sup>1</sup>H NMR (d6-DMSO): 0.85 (m, 12H, CH<sub>3</sub>), 1.20-1.50 (m, 48H, CH<sub>2</sub>), 2.19 (m, 8H, PCH<sub>2</sub>), 7.26 (s, 2H, Im C4 and C5), 8.23 ppm (m, 1H, Im C2); <sup>13</sup>C NMR (d6-DMSO): 14.3, 14.4, 17.8, 18.2, 21.2, 22.4, 22.7, 28.7, 29.3, 29.5, 29.6, 30.3, 30.4, 30.5, 30.6, 31.0, 31.9, 121.1, 135.2 ppm; <sup>15</sup>N NMR (CDCl<sub>3</sub>): 200.2 ppm; IR: 2956, 2927, 2856, 2126, 1748, 1466, 1325, 1143, 941, 693, 680, 664, 650 cm<sup>-1</sup>.

**Table S1.** The comparison of SO<sub>2</sub> absorption by azole-based ILs with that by other typical ILs and solid phase adsorbent materials.

| Ionic liquids                                         | Temperature/ | SO <sub>2</sub> absorption | SO <sub>2</sub> absorption | Reference              |
|-------------------------------------------------------|--------------|----------------------------|----------------------------|------------------------|
|                                                       | °C           | at 1 bar                   | at 0.1 bar                 |                        |
| [P <sub>66614</sub> ][Tetz]                           | 20           | 3.72                       | 1.54                       | this work              |
| [P <sub>66614</sub> ][Im]                             | 20           | 4.80                       | 2.07                       | this work              |
| [Bmim][BF <sub>4</sub> ]                              | 20           | 1.50                       | 0.005                      | Riisager <sup>3</sup>  |
| [Bmim][Tf <sub>2</sub> N]                             | 20           | 1.33                       | 0.007                      | Riisager <sup>3</sup>  |
| [TMGBu <sub>2</sub> ][BF <sub>4</sub> ]               | 20           | 1.60                       | 0.080                      | Riisager <sup>3</sup>  |
| [TMG][Lac] <sup>a</sup>                               | 40           | 1.70 <sup>c</sup>          | 0.978                      | Han <sup>4</sup>       |
| [E <sub>1</sub> mim][MeSO <sub>3</sub> ] <sup>b</sup> | 30           | 2.30                       |                            | Kim <sup>5</sup>       |
| [Bmim][MeSO <sub>4</sub> ]                            | 50           | 0.980                      |                            | Jung <sup>6</sup>      |
| [Bmim][OAc]                                           | 25           | 1.91                       | 0.664                      | Shiflett <sup>7</sup>  |
| [Hmim][Tf <sub>2</sub> N]                             | 25           | 0.916                      | 0.005                      | Brennecke <sup>8</sup> |
| Mg-MOF-74 <sup>d</sup>                                | 25           |                            | 1.560 <sup>e</sup>         | Glover <sup>9</sup>    |

<sup>a</sup>[TMG][Lac], 1,1,3,3-tetramethylguanidinium lactate. <sup>b</sup>[E<sub>1</sub>mim][MeSO<sub>3</sub>], 1-ethylene glycol monomethyl ether-3-methylimidazolium methanesulfonate. <sup>c</sup>At 1.2 bar. <sup>d</sup>SO<sub>2</sub> concentration 1000 mg/m<sup>3</sup> (~0.35 mba). <sup>e</sup>1.560 mol/kg.

**Table S2.** The effect of other flue gas constituents on SO<sub>2</sub> capture by [P<sub>66614</sub>][Tetz].<sup>a</sup>

| Gas                       | Temperature | Loading (mole/mole IL) |
|---------------------------|-------------|------------------------|
| Water stream <sup>b</sup> | 20          | 1.35                   |

|                                                     |    |                   |
|-----------------------------------------------------|----|-------------------|
| SO <sub>2</sub> (dry)                               | 20 | 3.72              |
| SO <sub>2</sub> (wet) <sup>b</sup>                  | 20 | 3.86 <sup>d</sup> |
| CO <sub>2</sub> <sup>c</sup>                        | 20 | 0.08              |
| 90%SO <sub>2</sub> +10%CO <sub>2</sub> <sup>c</sup> | 20 | 3.66              |

<sup>a</sup>Performed at 20 °C for 30 min. <sup>b</sup>Relative humidity is 100%. <sup>c</sup>At 1 atm. <sup>d</sup>Does not include mass of loaded water.

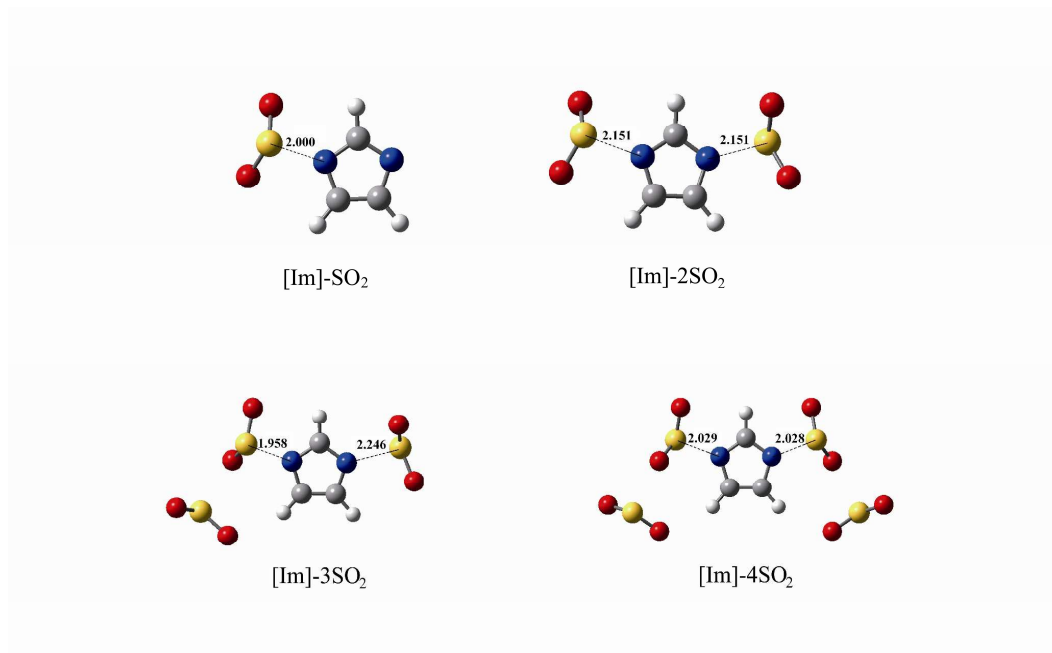

**Figure S1.** The optimized structure of [Im]-SO<sub>2</sub>, [Im]-2SO<sub>2</sub>, [Im]-3SO<sub>2</sub>, and [Im]-4SO<sub>2</sub>.

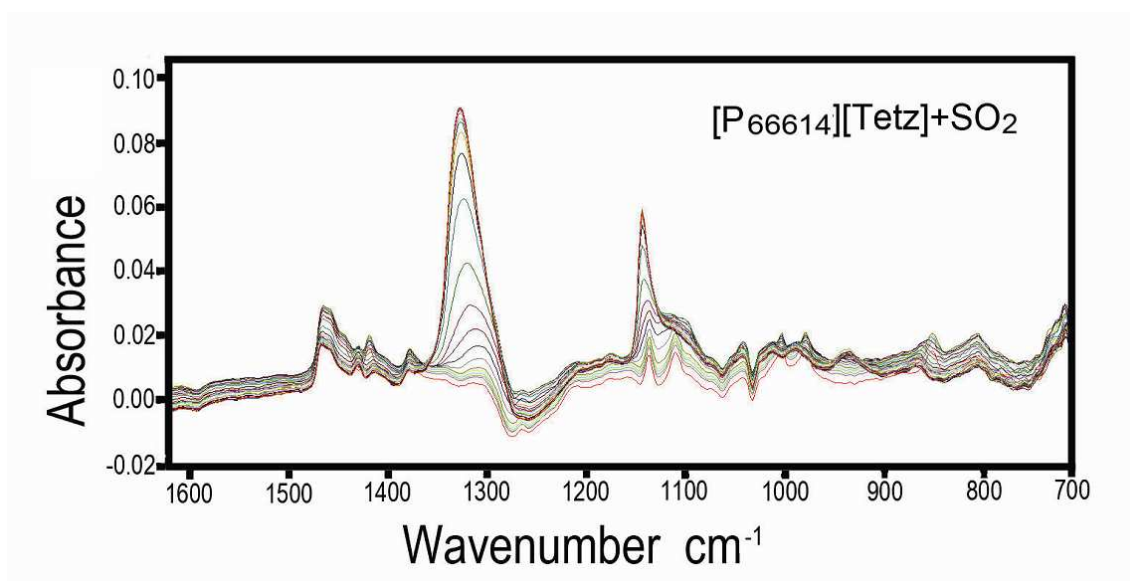

**Figure S2.** The stack plot of the in-situ FTIR spectra collected every 1 min for the SO<sub>2</sub>

capture of [P<sub>66614</sub>][Tetz] in 30 min under 20 °C.

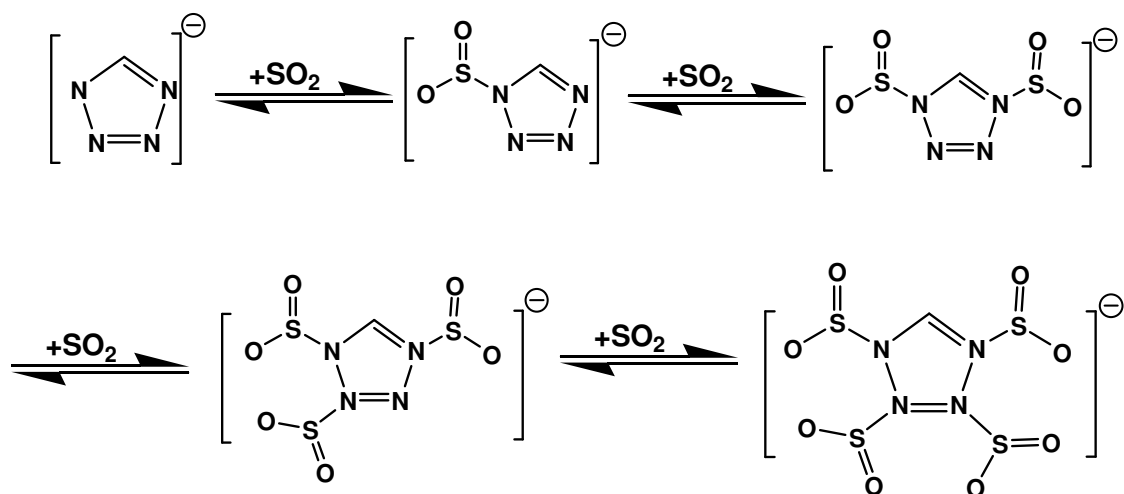

**Scheme S1.** The SO<sub>2</sub> absorption mechanism by the anion [Tetz] through multiple-site chemical absorption.

#### References:

- 1 Wang, C. M.; Luo, X. Y.; Luo, H. M.; Jiang, D.; Li, H. R.; Dai, S. *Angew. Chem., Int. Ed.* **2011**, *50*, 4918.
- 2 Fukumoto, K.; Yoshizawa, M.; Ohno, H. *J. Am. Chem. Soc.* **2005**, *127*, 2398.
- 3 Huang, J.; Riisager, A.; Wasserscheid, P.; Fehrmann, R. *Chem. Commun.* **2006**, 4027.
- 4 Wu, W. Z.; Han, B. X.; Gao, H. X.; Liu, Z. M.; Jiang, T.; Huang, J. *Angew. Chem., Int. Edit.* **2004**, *43*, 2415.
- 5 Hong, S. Y.; Im, J.; Palgunadi, J.; Lee, S. D.; Lee, J. S.; Kim, H. S.; Cheong, M.; Jung, K. *Energy Environ. Sci.* **2011**, *4*, 1802.
- 6 Lee, K. Y.; Gong, G. T.; Song, K. H.; Kim, H.; Jung, K. D.; Kim, C. S. *Int. J. Hydrogen Energy* **2008**, *33*, 6031.
- 7 Shiflett, M. B.; Yokozeki, A. *Ind. Eng. Chem. Res.* **2010**, *49*, 1370.
- 8 Anderson, J. L.; Dixon, J. K.; Maginn, E. J.; Brennecke, J. F. *J. Phys. Chem. B* **2006**, *110*, 15059.
- 9 Glover, T. G.; Peterson, G. W.; Schindler, B. J.; Britt, D.; Yaghi, O. *Chem. Eng. Sci.* **2011**, *66*, 163.
